# Supplementary material
Source: PubMed Central journal article supplement (PMC3966950)
Supplement: NIHMS559238-supplement-Dataset_1.pdf [file NIHMS559238-supplement-Dataset_1.pdf]

## MATERIALS AND METHODS

**Sources of genetically modified mice and description of dietary intervention studies.** All animal studies were performed with the approval of the UTHSCSA Institutional Animal Care and Use Committee. LDLR<sup>-/-</sup> mice were obtained from Jackson Laboratories (Bar Harbor, ME). iPLA<sub>2</sub>β<sup>-/-</sup> mice (iPLA<sub>2</sub>β-KO), and their wild type littermates were generated by mating heterozygotes and maintained as previously described.<sup>1-3</sup> For dietary intervention studies, male LDLR<sup>-/-</sup> mice 8 wk of age were housed in colony cages and maintained on a 12-h light/12-h dark cycle. After one week on a standard chow maintenance diet (MD, 7% soybean oil, AIN-93G, F3156, BioServ), mice were randomized into two groups and fed either MD (control mice) or a Western-style high-fat diet (HFD; 21% milk fat and 0.15% cholesterol, AIN-76A, F5540, BioServ) for 8, 16, or 24 weeks. Evening body weights and blood glucose levels were monitored biweekly and at the end of the study using a Contour®meter (Bayer). Plasma was prepared from whole blood drawn by cardiac puncture at the time of animal sacrifice. Plasma cholesterol and triglyceride levels were determined using enzymatic assay kits (Wako Chemicals). Epididymal fat pads were isolated and weighed. HFD-fed LDLR<sup>-/-</sup> mice eventually developed hyperglycemia and hyperlipidemia (Table).

**Quantitative morphometric analyses of atherosclerotic lesions.** Heart and aortic arch were processed as described previously to prepare aortic sinus sections for staining and histological analyses.<sup>4-7</sup> Tissues were frozen in OCT compound (Tissue-Tek) and cut into sections (10 μm thickness) that were stained with Oil-Red O to visualize neutral lipids and counterstained with hematoxylin. Atherosclerotic lesion areas were determined in 10 serial sections at 80 μm intervals that represented the entire length of each aortic sinus and quantified with Image-Pro Plus 6.0 software as previously described.<sup>3,5,8,9</sup> Macrophages in atherosclerotic lesions were identified by immunohistochemical staining with a primary antibody against CD68 and quantified with Image-Pro Plus 6.0 software.

**Adenoviral vectors to drive overexpression of iPLA<sub>2</sub>β and Nox4.** An adenoviral construct encoding iPLA<sub>2</sub>β was prepared with a ViraPower adenovirus expression system (Invitrogen) according to the manufacturer's instructions.<sup>10</sup> Briefly, cDNA that encodes the 84-kDa iPLA<sub>2</sub>β was subcloned into the pENTR directional TOPO cloning vector.<sup>11</sup> After sequence verification, the iPLA<sub>2</sub>β cDNA was transferred into pAd/CMV/V5-DEST vector with the Gateway system using LR clonase (Invitrogen). Positive clones were confirmed by sequencing. The clones were linearized using PacI (New England Biolabs) and then transfected into 293A cells with Lipofectamine 2000 using Opti-MEM medium. Virus was prepared and amplified with the ViraPower adenoviral expression system (Invitrogen), and viral titers were determined by plaque-forming assays with 293A cells. An aliquot of viral suspension was used to infect mouse peritoneal macrophages, and iPLA<sub>2</sub> activity was assayed 3 days after infection. As a control, pAd/CMV/V5-GW/lacZ vector (Invitrogen) was transfected into 293A cells to produce lacZ-bearing adenovirus that did not contain the iPLA<sub>2</sub>β coding sequence. Adenovirus encoding wild type Nox4 (AdWTNox4) was generously provided by Dr. B. J. Goldstein (Merck, Sharp, & Dohme Corp.) Experiments *ex vivo* to examine whether overexpression of iPLA<sub>2</sub>β or Nox4 reversed effects of the inhibitors BEL and GKT137831, respectively, involved preincubating macrophages with the appropriate inhibitor, followed by removal of the medium and replacing it with fresh medium without inhibitor, rinsing the cells once with PBS (37°C), and then transfection with the adenoviral vectors described above.

**Isolation and culture of mouse peritoneal macrophages.** Resident peritoneal macrophages from male LDLR<sup>-/-</sup> mice fed MD or HFD, and from male C57BL/6J mice (age 16 wk) fed standard chow were harvested by lavage<sup>4,5</sup> and cultured (45 min) in medium supplemented with 15% fetal bovine serum (FBS) in petri dishes that had been coated with heat-inactivated FBS by overnight incubation. Non-adherent cells were removed by washing,

and macrophages, which remained attached, were cultured overnight in medium containing 15% FBS. Adherent cells were detached by incubation in  $\text{Ca}^{2+}$  and  $\text{Mg}^{2+}$ -free PBS containing 0.02% EDTA. Peritoneal macrophage recoveries of 90% were routinely obtained, and all recovered cells were viable, as demonstrated by trypan blue exclusion. *Ex vivo* experiments with the isolated macrophages were performed at a measured cell density of  $2 \times 10^5$  cells/mL in RPMI 1640 medium containing 5 mM D-glucose (normal glucose, NG) or 30 mM D-glucose (high glucose, HG) without or with human LDL (100  $\mu\text{g}/\text{mL}$ ) for 8, 16, or 24 hr as specified in the figure legends. The designation “MS” denotes culture in medium that contained both 30 mM D-glucose and 100  $\mu\text{g}/\text{mL}$  LDL.

**LDL isolation.** LDL was purchased from Biomedical Technologies (Stoughton, MA) or prepared from pooled plasma from healthy blood donors by KBr-gradient ultracentrifugation and gel-filtration chromatography, followed by sterilization by filtration, and characterized by described procedures.<sup>4</sup>

**Extraction and quantification of macrophage 2-lysophosphatidic acid (LPA).** LPA was extracted from macrophages essentially as described with minor modifications<sup>12</sup>. In brief, isolated macrophages were homogenized in normal saline (0.9% NaCl, 200  $\mu\text{l}$ , ice-cold) containing o-vanadate (100 mM) and EDTA (1 mM). Homogenates were placed in glass tubes (13  $\times$  100 mm), mixed with acetone (1 mL), vortex-mixed, and centrifuged (1300  $\times$  g, 5 min). The resultant pellet was washed (0.5 mL acetone, twice), and concentrated to dryness under nitrogen. The residue was reconstituted in chloroform (0.1 mL), methanol (0.2 mL), and water (0.08 mL), and the mixture was centrifuged (1300  $\times$  g, 5 min). Supernatant was mixed with chloroform (0.2 mL), aqueous KCl (5%, 0.2 mL), and aqueous ammonia (28%, 0.001 mL), and the mixture was again centrifuged (1300  $\times$  g, 5 min). The supernatant was washed with chloroform/methanol (17/3, v/v, 0.4 mL, four times), and then monoisotopic [ $^{68}\text{Zn}$ ] $^{2+}$ -Phos-tag (10 nmol) and chloroform/methanol (17:3, v/v, 0.4 mL) were added to the supernatant (that consisted of the water/methanol phase). The mixture was vortex-mixed and centrifuged, and the lower (chloroform) phase was collected. The residual water/methanol phase was extracted again, and the combined chloroform phases were concentrated to dryness under nitrogen. The residue was reconstituted (50  $\mu\text{L}$ , methanol containing 0.1% aqueous ammonia) and stored at  $-20^\circ\text{C}$  until the time of analysis. Quantification of LPA content was performed with an Echelon LPA competitive ELISA kit (K-2800S, Echelon, Salt Lake City, UT) according to the manufacturer's instructions.

**iPLA<sub>2</sub> enzymatic activity assay.** iPLA<sub>2</sub> enzymatic activity was measured by a commercial iPLA<sub>2</sub> assay kit (Cayman, Ann Arbor, MI) under  $\text{Ca}^{2+}$ -free conditions as described<sup>13-15</sup>. Briefly, at the end of the incubation intervals under conditions described in the figure legends, macrophages were detached from the plates with a cell scraper in buffer (500  $\mu\text{L}$ , 50 mM HEPES, pH 7.4, 1 mM EDTA) and disrupted by sonication (on ice, Branson Sonifier 450, duty cycle 30%, speed 30 s, interval 1 min, 6–10 times). The resultant homogenates were centrifuged (10,000  $\times$  g, 15 min,  $4^\circ\text{C}$ ), and the protein concentration of the supernatant was determined. iPLA<sub>2</sub> activity was measured by incubating (1 hr,  $24^\circ\text{C}$ ) an aliquot of supernatant with substrate (arachidonoyl thio-phosphatidylcholine) in  $\text{Ca}^{2+}$ -free buffer (300 mM NaCl, 0.5% Triton X-100, 60% glycerol, 4 mM EGTA, 10 mM HEPES, pH 7.4, with 2 mg/ml bovine serum albumin). Reactions were terminated by adding 5,5'-dithiobis(nitrobenzoic acid). After 5 min, absorbance was determined (414 nm) with a standard plate reader and expressed per mg of protein as a measure of iPLA<sub>2</sub> activity. As described,<sup>8, 16</sup> a BEL-insensitive background iPLA<sub>2</sub>-independent component of basal lipase activity was determined in control samples when specific iPLA<sub>2</sub> activity was inhibited by BEL pretreatment (25  $\mu\text{M}$ , 30 min,  $37^\circ\text{C}$ ). This background activity was subtracted to achieve a measure of BEL-sensitive iPLA<sub>2</sub> activity.

**Measurements of ROS and H<sub>2</sub>O<sub>2</sub>.** Intracellular ROS (O<sup>2-</sup> and H<sub>2</sub>O<sub>2</sub>) production was measured in cells loaded DCFH-DA (Invitrogen, 10 μM, 1 hr), with a redox-sensitive indicator that preferentially reacts with H<sub>2</sub>O<sub>2</sub> and other ROS <sup>4</sup>. Intracellular ROS production (reflected by DCF fluorescence) was measured by fluorescence-activated cell sorting (FACS Calibur System, Becton Dickinson). Measurement of intracellular H<sub>2</sub>O<sub>2</sub> was performed with Abnova Hydrogen Peroxide Assay kits (KA0801) or the Amplex Red assay kit from Invitrogen (A22188) according to the manufacturer's instructions.

**Measurement of NADPH oxidase activity.** Macrophages were washed in PBS (ice-cold, five times), detached from the plates, and centrifuged (800 rpm, 10 min, 4°C). Cellular pellets were resuspended in lysis buffer [20 mmol/l KH<sub>2</sub>PO<sub>4</sub>, pH 7.0, 1 mM EGTA, 1 mM phenylmethylsulfonyl fluoride (PMSF), 10 μg/ml aprotinin, 0.5 μg/ml leupeptin], and the suspensions were homogenized (300 strokes, Dounce apparatus, on ice). Assays were initiated by adding aliquots (20 μg protein) of cellular homogenates to phosphate buffer (50 nM, pH 7.0, 1 mmol/l EGTA, 150 mmol/l sucrose, 5 μmol/l lucigenin) containing NADPH (100 μM). Photon emission was measured (20 to 30 s intervals, 10 min) in a luminometer and expressed as relative light units (RLU). There was no measurable activity in the absence of NADPH. A buffer blank was measured and subtracted from each reading. Blank values represented less than 5% of signal obtained from cellular activity. Superoxide production was expressed as RLU/(mg protein)/min. Protein content was measured using a Bio-Rad protein assay reagent.

**Macrophage migration in response to Monocyte Chemoattractant Protein-1 (MCP-1).** Isolated mouse peritoneal macrophages were preincubated in medium supplemented with 5 mM D-glucose (NG) or 30 mM D-glucose (HG) without or with LDL (100 μg/mL), and medium was then removed and replaced with fresh medium without or with various test agents for the intervals indicated in the figure legends. At the end of the incubation intervals, the cells were placed in the upper wells of a 48-well modified Boyden chamber (NeuroProbe). Medium in the lower wells contained MCP-1 (2 nM, R&D Systems). A polyvinylpyrrolidone-free polycarbonate filter membrane with 5 μm pores was placed between the upper and lower chambers, and incubations were performed (90 min, 37°C, 5% CO<sub>2</sub>). The membrane was then washed, and cells were removed from its upper side. Cells that had transmigrated through the filter to reach the lower side of the membrane were stained (Diff-Quik® Set, Dade Behring, Newark, DE) and counted (five separate high power fields, 400X magnification, light microscope).

**Western blotting analyses.** The protein contents of cellular homogenates prepared in RIPA lysis buffer (20 mM Tris-HCl, pH 7.5, 150 mM NaCl, 5 mM EDTA, 1 mM Na<sub>3</sub>VO<sub>4</sub>, 1 mM PMSF, 20 μg/mL aprotinin, 20 μg/mL leupeptin, 1% NP-40) were determined by Bio-Rad protein assay, and aliquots were analyzed by SDS-PAGE. Gel protein bands were electroblotted onto polyvinylidene fluoride microporous membranes (Bio-Rad) that were then blocked (5% low-fat milk, Tris-buffered saline) and probed with primary antibodies (1:1000 dilutions) directed against target proteins specified in the figure legends that included a Nox 4 monoclonal antibody (Epitomics) and an iPLA<sub>2</sub>β polyclonal antibody (Cayman Chemical, Ann Arbor, MI). Appropriate HRP-conjugated secondary antibodies were then added (1:3000), and bands were visualized by enhanced chemiluminescence. Densitometric analysis was performed using NIH Image/ImageJ software.

**Knockdown of LPA receptor expression with siRNA.** Peritoneal macrophages were transiently transfected with siRNA oligonucleotides by using Lipofectamine 2000 (Invitrogen). Two or three different siRNAs against each target were tested. The most effective siRNAs for LPA1 (GAAAUGAGCGCCACCUUUA), LPA3 (CAGCAGGAGTTACCTTGTT), and non-silencing RNA (NS, D-001810-10) were obtained from Dharmacon (Lafayette, CO). The primary rabbit polyclonal IgG antibodies against LPA receptors 1 and 3 were purchased from Millipore.

**Phospholipase D activity assay.** PLD activity was measured by synthesis of [<sup>3</sup>H]-phosphatidylethanol (PEth). Macrophages were seeded in 6-well-plates. To label phospholipids, cells were incubated (24 hr) in serum-free medium containing [<sup>3</sup>H]-glycerol (1 μCi per mL). Subsequently, the cells were washed and incubated medium containing 5 mM glucose or 30 mM glucose and 100 μg/mL LDL. PLD inhibitors were added 30 min prior to addition of 30 mM glucose and LDL. After incubation (16 hr), phospholipids were extracted from cells and analyzed by thin layer chromatography. Spots corresponding to phosphatidylcholine, phosphatidic acid, and PEth were scraped from the plates separately, and their [<sup>3</sup>H] content was determined by liquid scintillation counting.

**Statistical analyses.** Data were analyzed using ANOVA (SPSS 17.0) and subjected to parametric or nonparametric *post hoc* analyses. Multiple comparisons were performed by using the Least Significant Difference method. Linear correlation tests were performed with SigmaPlot version 12. Data are presented as mean ± SEM of at least 3 independent experiments unless otherwise indicated, and results were considered significant for  $p < 0.05$ .

## REFERENCES

1. Bao S, Miller DJ, Ma Z, Wohltmann M, Eng G, Ramanadham S, Moley K, Turk J. Male mice that do not express group via phospholipase a2 produce spermatozoa with impaired motility and have greatly reduced fertility. *The Journal of biological chemistry*. 2004;279:38194-38200
2. Bao S, Song H, Wohltmann M, Ramanadham S, Jin W, Bohrer A, Turk J. Insulin secretory responses and phospholipid composition of pancreatic islets from mice that do not express group via phospholipase a2 and effects of metabolic stress on glucose homeostasis. *The Journal of biological chemistry*. 2006;281:20958-20973
3. Bao S, Jacobson DA, Wohltmann M, Bohrer A, Jin W, Philipson LH, Turk J. Glucose homeostasis, insulin secretion, and islet phospholipids in mice that overexpress ipla2beta in pancreatic beta-cells and in ipla2beta-null mice. *American journal of physiology. Endocrinology and metabolism*. 2008;294:E217-229
4. Ullevig S, Zhao Q, Lee CF, Seok Kim H, Zamora D, Asmis R. NADPH oxidase 4 mediates monocyte priming and accelerated chemotaxis induced by metabolic stress. *Arteriosclerosis, thrombosis, and vascular biology*. 2012;32:415-426
5. Ullevig SL, Zhao Q, Zamora D, Asmis R. Ursolic acid protects diabetic mice against monocyte dysfunction and accelerated atherosclerosis. *Atherosclerosis*. 2011;219:409-416
6. Ishibashi M, Egashira K, Zhao Q, Hiasa K, Ohtani K, Ihara Y, Charo IF, Kura S, Tsuzuki T, Takeshita A, Sunagawa K. Bone marrow-derived monocyte chemoattractant protein-1 receptor ccr2 is critical in angiotensin ii-induced acceleration of atherosclerosis and aneurysm formation in hypercholesterolemic mice. *Arteriosclerosis, thrombosis, and vascular biology*. 2004;24:e174-178
7. Ni W, Kitamoto S, Ishibashi M, Usui M, Inoue S, Hiasa K, Zhao Q, Nishida K, Takeshita A, Egashira K. Monocyte chemoattractant protein-1 is an essential inflammatory mediator in angiotensin ii-induced progression of established atherosclerosis in hypercholesterolemic mice. *Arteriosclerosis, thrombosis, and vascular biology*. 2004;24:534-539

8. Wang J, Boja ES, Tan W, Tekle E, Fales HM, English S, Mieyal JJ, Chock PB. Reversible glutathionylation regulates actin polymerization in a431 cells. *The Journal of biological chemistry*. 2001;276:47763-47766
9. Hordijk PL. Regulation of nadph oxidases: The role of rac proteins. *Circulation research*. 2006;98:453-462
10. Bao S, Li Y, Lei X, Wohltmann M, Jin W, Bohrer A, Semenkovich CF, Ramanadham S, Tabas I, Turk J. Attenuated free cholesterol loading-induced apoptosis but preserved phospholipid composition of peritoneal macrophages from mice that do not express group via phospholipase a2. *The Journal of biological chemistry*. 2007;282:27100-27114
11. Ma Z, Ramanadham S, Kempe K, Chi XS, Ladenson J, Turk J. Pancreatic islets express a ca2+-independent phospholipase a2 enzyme that contains a repeated structural motif homologous to the integral membrane protein binding domain of ankyrin. *The Journal of biological chemistry*. 1997;272:11118-11127
12. Morishige J, Urikura M, Takagi H, Hirano K, Koike T, Tanaka T, Satouchi K. A clean-up technology for the simultaneous determination of lysophosphatidic acid and sphingosine-1-phosphate by matrix-assisted laser desorption/ionization time-of-flight mass spectrometry using a phosphate-capture molecule, phos-tag. *Rapid communications in mass spectrometry : RCM*. 2010;24:1075-1084
13. Smani T, Zakharov SI, Csutora P, Leno E, Trepakova ES, Bolotina VM. A novel mechanism for the store-operated calcium influx pathway. *Nature cell biology*. 2004;6:113-120
14. Smani T, Zakharov SI, Leno E, Csutora P, Trepakova ES, Bolotina VM. Ca2+-independent phospholipase a2 is a novel determinant of store-operated ca2+ entry. *The Journal of biological chemistry*. 2003;278:11909-11915
15. Yellaturu CR, Rao GN. A requirement for calcium-independent phospholipase a2 in thrombin-induced arachidonic acid release and growth in vascular smooth muscle cells. *The Journal of biological chemistry*. 2003;278:43831-43837
16. Fiaschi T, Cozzi G, Raugei G, Formigli L, Ramponi G, Chiarugi P. Redox regulation of beta-actin during integrin-mediated cell adhesion. *The Journal of biological chemistry*. 2006;281:22983-22991
